# Supplementary material for: Elevated TIMP-1 expression is associated with a prometastatic phenotype, disease relapse, and poor survival in neuroblastoma
Source: PubMed Central journal article supplement (PMC5669914; doi:10.18632/oncotarget.19664), 2017-07-28
Supplement: oncotarget-08-82609-s001.pdf [file oncotarget-08-82609-s001.pdf]

## Elevated TIMP-1 expression is associated with a prometastatic phenotype, disease relapse, and poor survival in neuroblastoma

### SUPPLEMENTARY MATERIALS

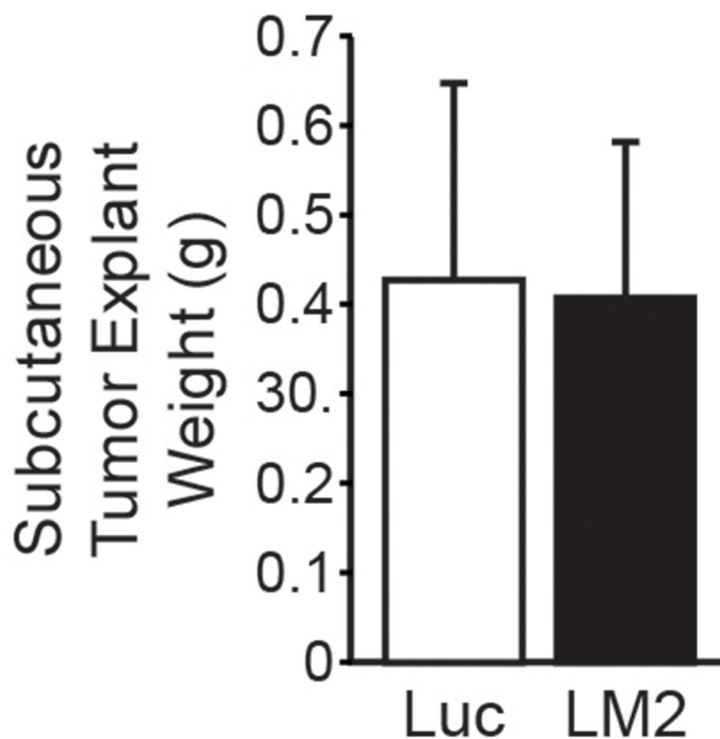

**Supplementary Figure 1: BE(2)-C/LM2 subclone does not generate larger subcutaneous tumors.** Parental BE(2)-C/Luc and BE(2)-C/LM2 cells were injected into the bilateral flanks of male athymic nude mice (n=5 mice). No difference in tumor explant mass was detected at the conclusion of the four week study (mean  $\pm$  SEM;  $p=0.73$ ).

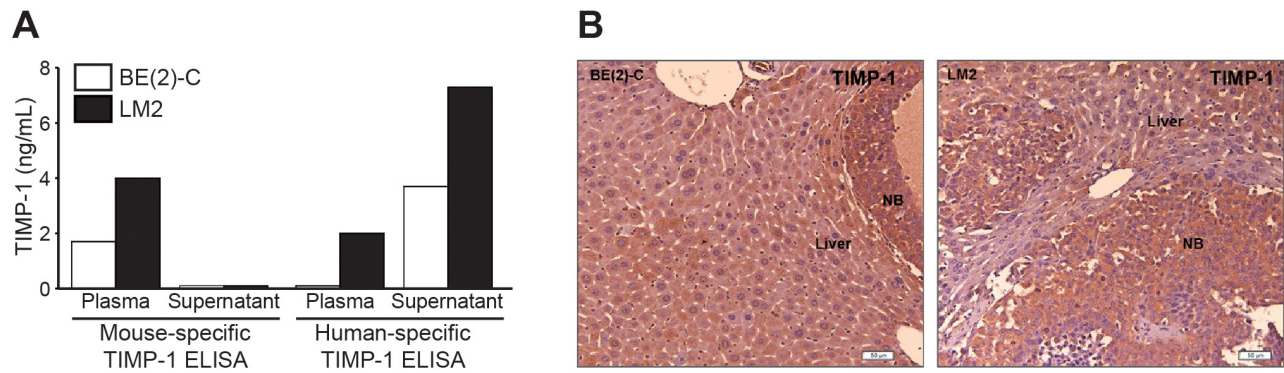

**Supplementary Figure 2: Controls for *in vivo* TIMP-1 quantification.** (A) Mouse TIMP-1 ELISA did not detect human TIMP-1 in BE(2)-C culture supernatant, but detected the TIMP-1 from plasma of mice engrafted with BE(2)-C or LM2 cells. Human TIMP-1 ELISA detected TIMP-1 from both cell culture supernatant and mice plasma. (B) Immunostaining for TIMP-1 in the hepatic lesions of mice injected with BE(2)-C/Luc versus BE(2)-C/LM2 with H&E to permit visualization of hepatic parenchyma and neuroblastoma tumor deposits.

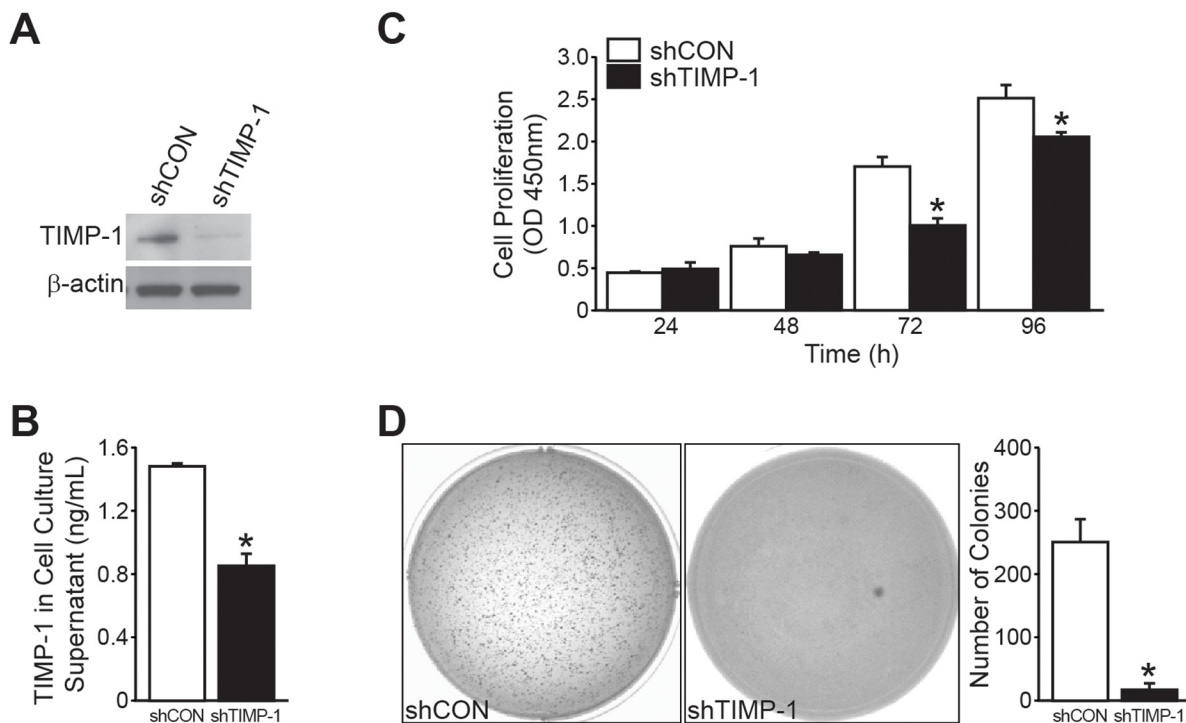

**Supplementary Figure 3: shRNA-mediated TIMP-1 silencing reduced neuroblastoma growth *in vitro*.** BE(2)-C/LM2 cells were transfected with shRNA against control (shCON) or TIMP-1 (shTIMP-1). **(A, B)** Immunoblotting and human-specific TIMP-1 ELISA confirmed shRNA-mediated TIMP-1 silencing, respectively. **(C)** Rate of proliferation of BE(2)-C/LM2/shTIMP-1 was markedly reduced in comparison to BE(2)-C/LM2/shCON. **(D)** Targeting TIMP-1 using shRNA inhibited anchorage-independent growth of BE(2)-C/LM2/shTIMP-1 cells in comparison to BE(2)-C/LM2/shCON cells (mean ± SEM; \* =  $p < 0.05$ ).

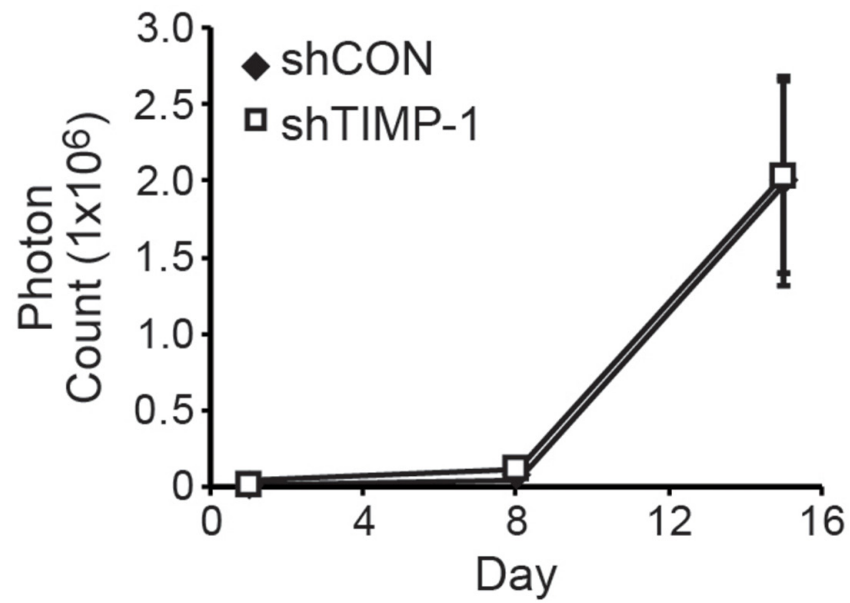

**Supplementary Figure 4: Lowering splenic inoculum fails to elicit a difference in *in vivo* metastasis with TIMP-1 silencing.** The splenic tumor cell inoculum was decreased to by a factor of 10 (from 500,000 to 50,000 cells) from our standard model conditions. Tumor latency was increased but no difference in *in vivo* bioluminescence was observed over the 15 day trial period ( $p=0.98$ ).

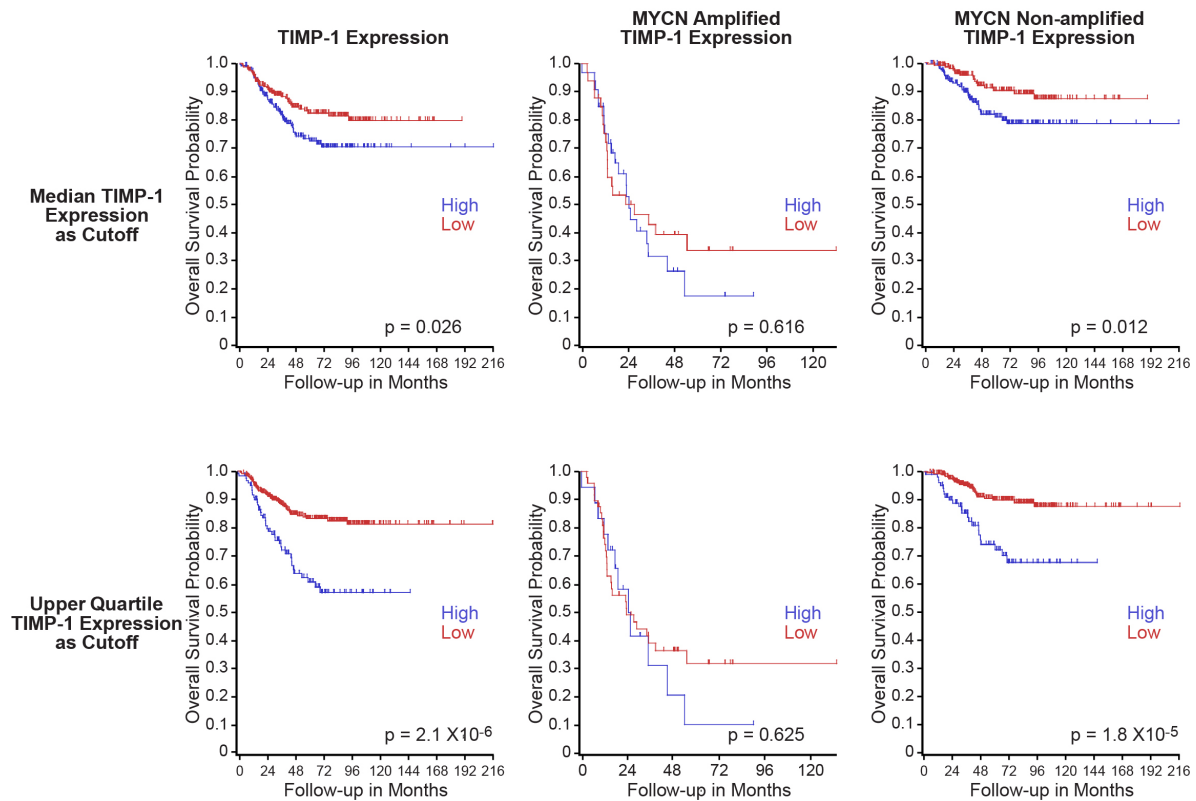

**Supplementary Figure 5: Kaplan-Meier Analysis of TIMP-1 using median and high-quartile cutoffs.** The Kocak microarray expression dataset was used with TIMP1 expression determined to be high or low using both median and high quartile level of expression as cutoffs [16]. High TIMP1 expression was associated with reduced overall survival when median ( $p = 0.026$ ) and high quartile ( $p = 2.1 \times 10^{-6}$ ) level of expression were used as cutoffs. High TIMP1 expression was not associated with a survival difference in patients with *MYCN*-amplification (Median:  $p = 0.616$ ; High Quartile:  $p = 0.625$ ). In *MYCN* non-amplified patients, however, high TIMP1 expression was associated with reduced overall survival (Median:  $p = 0.012$ ; High Quartile:  $p = 1.8 \times 10^{-5}$ ).

**Supplementary Table 1: Tissue microarray demonstrates that increased TIMP-1 expression is associated with decreased survival in advanced stage (III, IV, IVs) neuroblastoma**

| Number | Stage | <i>MYCN</i> amp | Relapse    | Status          | TIMP-1 |
|--------|-------|-----------------|------------|-----------------|--------|
| 1      | 3     | Yes             | No         | Alive           | ++     |
| 2      | 4S    | No              | No         | Alive           | -      |
| 3      | 4     | Yes             | No         | Alive           | -      |
| 4      | 4     | No              | Yes        | Alive           | -      |
| 5      | 4     | No              | No         | Alive           | ++     |
| 6      | 4     | Yes             | No         | Alive           | -      |
| 7      | 4S    | No              | No         | Alive           | +      |
| 8      | 4S    | No              | No         | Alive           | +      |
| 9      | 4     | No              | No         | Alive           | +      |
| 10     | 4     | No              | Refractory | Likely deceased | ++     |
| 11     | 4     | Yes             | Refractory | Deceased        | +++    |
| 12     | 4     | No              | Refractory | Deceased        | ++     |
| 13     | 4     | Yes             | Refractory | Deceased        | ++     |
| 14     | 4     | Yes             | Refractory | Deceased        | ++     |
| 15     | 3     | Yes             | Yes        | Deceased        | +      |
| 16     | 4     |                 | Yes        | Deceased        | +      |
| 17     | 4S    | Yes             | Yes        | Deceased        | ++     |
| 18     | 4     | Yes             | Yes        | Deceased        | +      |
| 19     | 4     | No              | No         | Deceased        | ++     |
| 20     | 3     | Yes             | Yes        | Deceased        | ++     |

Clinical variables (age, stage at presentation, *MYCN*-amplification) recurrence status, and survival are displayed in correlation with relative TIMP-1 expression quantification as determined by a blinded pediatric pathologist. High TIMP-1 expression (++ or +++) was associated with increased mortality as compared to patients with weak TIMP-1 expression (- or +; 8/10 vs. 3/10;  $p=0.04$ ).
